# Supplementary material for: Processing mechanism of guanidinoacetate in choroid plexus epithelial cells: conversion of guanidinoacetate to creatine via guanidinoacetate N-methyltransferase and monocarboxylate transporter 12-mediated creatine release into the CSF
Source: Springer Nature journal article supplement (doi:10.1186/s12987-022-00328-w), 2022-06-03
Supplement: MOESM1 [file 23125442]

## **Additional file 1**

# **Processing Mechanism of Guanidinoacetate in Choroid Plexus Epithelial Cells: Conversion of Guanidinoacetate to Creatine via Guanidinoacetate N-Methyltransferase and Monocarboxylate Transporter 12-Mediated Creatine Release into the CSF**

**Ryuta Jomura<sup>1</sup>, Shin-ichi Akanuma<sup>1</sup>, Yoshiyuki Kubo<sup>1</sup>, Masanori Tachikawa<sup>2</sup>, Ken-ichi Hosoya<sup>1</sup>**

<sup>1</sup>Department of Pharmaceutics, Graduate School of Medicine and Pharmaceutical Sciences, University of Toyama; 2630 Sugitani, Toyama 930-0194, Japan

<sup>2</sup>Graduate School of Biomedical Sciences, Tokushima University; 1-78-1 Shomachi, Tokushima 770-8505, Japan

Corresponding author: Ken-ichi Hosoya

E-mail: [hosoyak@pha.u-toyama.ac.jp](mailto:hosoyak@pha.u-toyama.ac.jp)

Tel.: +81-76-434-7505; Fax: +81-76-434-5172

**Additional file 1: Immunohistochemical staining of MCT12 in the rat brain cortex**

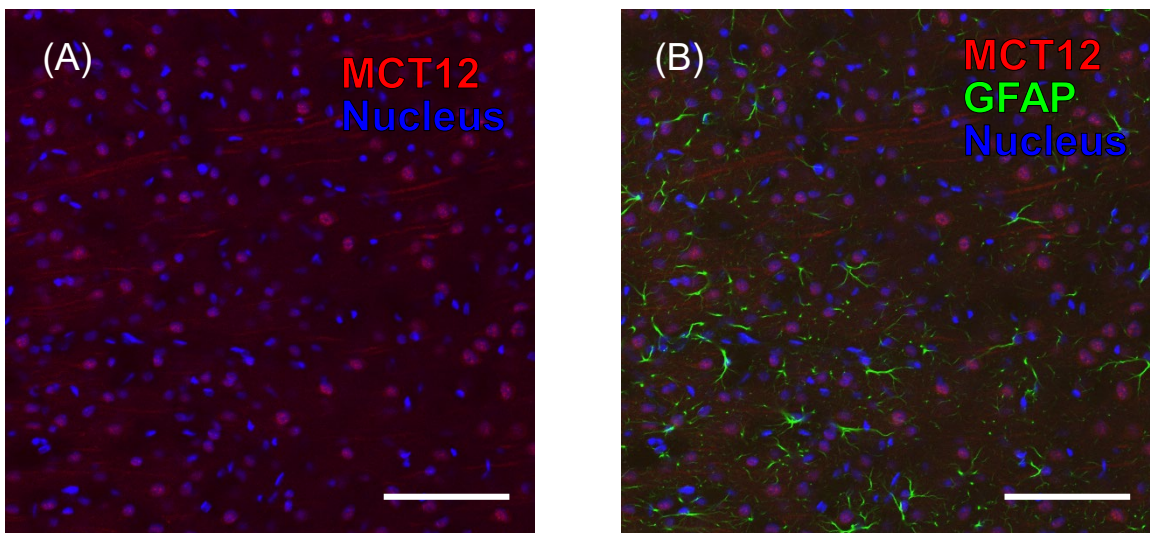

Double immunohistochemical staining was performed using anti-MCT12 antibodies (red, A and B) and anti-glial fibrillary acidic protein (GFAP) antibodies (green, B) in the rat brain cortex. GFAP is used as a marker of astrocytes. Nuclei were stained with DAPI (blue). Scale bar: 100  $\mu\text{m}$ .
